# Supplementary material for: DNA damage in embryonic neural stem cell determines FTLDs’ fate via early-stage neuronal necrosis
Source: Life Sci Alliance. 2021 Jun 15;4(7):e202101022. doi: 10.26508/lsa.202101022 (PMC9715434; doi:10.26508/lsa.202101022)
Supplement: Supplementary file 6 [file LSA-2021-01022_SdataFS5.xlsx]

## Sheet: SupFigS5
Supplementary FigureS5
SupFigS5A
number of cells
1 day		2 days		3 days
C57BL/6J	VCP-KI	C57BL/6J	VCP-KI	C57BL/6J	VCP-KI
26.5	18.5	72.5	35.5	125.5	92.5
39	21	66	37.5	145	80.5
32.5	14.5	81	40	149.5	67
p-value	0.0363465	p-value	0.00973871	p-value	0.0045063
SupFigS5C&D
ratio of BrdU(+) cell number / VZ cell number																			ratio of BrdU & p-H3(+) cell number / p-H3(+) cell number
1 h		1.5 h		2 h		3.5 h		6.5 h		9.5 h		12 h		15.5 h		24 h			1 h		1.5 h		2 h
C57BL/6J	VCP-KI	C57BL/6J	VCP-KI	C57BL/6J	VCP-KI	C57BL/6J	VCP-KI	C57BL/6J	VCP-KI	C57BL/6J	VCP-KI	C57BL/6J	VCP-KI	C57BL/6J	VCP-KI	C57BL/6J	VCP-KI		C57BL/6J	VCP-KI	C57BL/6J	VCP-KI	C57BL/6J	VCP-KI
0.370245	0.331736	0.409785	0.384828	0.439989	0.415342	0.544619	0.449547	0.723724	0.614584	0.81915	0.72449	0.948825	0.883334	0.95	0.95	0.95	0.95		0.193945	0.183007	0.595811	0.578394	0.879932	0.869808
