# Supplementary material for: DNA damage in embryonic neural stem cell determines FTLDs’ fate via early-stage neuronal necrosis
Source: Life Sci Alliance. 2021 Jun 15;4(7):e202101022. doi: 10.26508/lsa.202101022 (PMC9715434; doi:10.26508/lsa.202101022)
Supplement: Supplementary file 7 [file LSA-2021-01022_SdataFS6.xlsx]

## Sheet: SupFigS6
Supplementary Figure S6
SupFig S6A			SupFig S6B
exit ratio				B6	VCP-KI
C57BL/6J	VCP-KI		mouse #1	0.161998	0.246466
0.49	0.72		mouse #2	0.12777	0.278996
0.44	0.67		mouse #3	0.172604	0.311982
0.48	0.73
p-value	0.000713248		t.test		0.00763238
SupFig S6C
Sox2+ cell number at E10		Tbr2+ cell number at E10		Sox2+ cell number at E15		Tbr2+ cell number at E15
C57BL/6J	VCP-KI	C57BL/6J	VCP-KI	C57BL/6J	VCP-KI	C57BL/6J	VCP-KI
216.896	226.32	52.1111	52.1111	477.702	339.494	296.9	215.357
200.949	218.876	54.6667	50.8889	476.204	325.209	404.764	212.345
220.396	214.852	51	49	528.087	334.476	311.938	201.58
p-value	0.174632	p-value	0.122316	p-value	0.000393082	p-value	0.00980829
SupFig S6D
C57BL/6J	VCP-KI
0	0
0	0
0	0
