# Supplementary material for: DNA damage in embryonic neural stem cell determines FTLDs’ fate via early-stage neuronal necrosis
Source: Life Sci Alliance. 2021 Jun 15;4(7):e202101022. doi: 10.26508/lsa.202101022 (PMC9715434; doi:10.26508/lsa.202101022)
Supplement: Supplementary file 8 [file LSA-2021-01022_SdataF3.xlsx]

## Sheet: Figure3
Figure 3
Figure 3A
pMCM3/GAPDH		pMCM3 / MCM3		pMCM2 / GAPDH		pMCM2 / MCM2
C57BL/6J	VCP-KI	C57BL/6J	VCP-KI	C57BL/6J	VCP-KI	C57BL/6J	VCP-KI
0.850452	6.84624	0.911803	5.62965	1.4747	2.15662	1.35494	2.32142
1.0744	7.39497	1.06537	8.78755	0.320301	1.90791	0.286459	1.49008
0.475938	8.71944	1.42939	8.93001	1.38853	1.29577	1.17272	1.1981
1.59921	9.21339	1.72696	8.66416	0.232722	1.92826	0.270456	1.50321
		0.527683		1.54487	1.34384	1.41342	1.70536
		0.338792		1.03888	2.03339	1.502	1.97829
p-value	0.000285535		0.00196239		0.0239231		0.0360588
by Student's t-test
Figure 3E
pCDK1 / CDK1		pCDK2 / CDK2		pATM / ATM		pDNA-PK / DNA-PK		pCDK4 / CDK4		pDAPK1 / DAPK1		pChK1 / ChK1		pChK2 / ChK2
C57BL/6J	VCP-KI	C57BL/6J	VCP-KI	C57BL/6J	VCP-KI	C57BL/6J	VCP-KI	C57BL/6J	VCP-KI	C57BL/6J	VCP-KI	C57BL/6J	VCP-KI	C57BL/6J	VCP-KI
1.20036	3.02848	1.08933	3.76794	0.302177	2.98541	1.20793	2.94557	1.28151	0.992898	0.775672	0.783717	1.15915	0.9417	0.531954	3.52144
1.1043	3.36499	0.35778	1.8756	0.488682	1.4046	0.80825	2.31692	1.02012	0.812197	0.726794	1.37867	1.03712	0.944476	0.759912	2.17651
0.644118	2.38371	1.28376	2.36155	1.8731	1.84632	1.09981	2.53217	0.68971	1.16255	1.40519	1.14709	0.689897	1.20698	1.49349	1.53993
1.24359	2.75577	1.12392	3.60853	0.787981	3.22644	0.840215	3.05156	1.28094	0.638721	1.17131	0.8968	1.17707	0.887697	0.533265	1.8666
1.10555	3.25662	0.700709	1.58665	0.596015	1.36839	0.741142	2.34884	1.05346	0.760042	1.1695	1.28203	0.669382	1.2281	1.15655	1.05961
0.702076	2.30033	1.4445	2.494	1.95205	3.07146	1.30265	2.51239	0.674258	1.07959	0.751535	1.16543	1.26738	0.896637	1.52483	2.50828
p-value	2.13025e-05	p-value	0.00504822	p-value	0.0178938	p-value	2.26445e-06	p-value	0.518859	p-value	0.48259	p-value	0.890142	p-value	0.0237392
pCDK1	CDK1	GAPDH	pCDK2	CDK2	GAPDH	pATM	ATM	GAPDH	pDNA-PK	DNA-PK	GAPDH	pCDK4	CDK4	GAPDH	pChk1	Chk1	GAPDH	pDAPK1	DAPK1	GAPDH	pChk2	Chk2	GAPDH
Figure 3F
pDNA-PK intensity		pCDK1 intensity		gH2AX intensity		53BP1 intensity		pMCM3 intensity
C57BL/6J	VCP-KI	C57BL/6J	VCP-KI	C57BL/6J	VCP-KI	C57BL/6J	VCP-KI	C57BL/6J	VCP-KI
3.47937	16.1813	2.74143	6.12677	2.03977	15.4272	1.76277	11.4334	6.0349	15.1732
3.21723	17.0495	2.18007	7.45087	5.42397	14.5425	2.5376	12.013	4.87533	14.3531
4.54157	21.3552	1.28463	11.1044	4.36127	19.9835	3.19487	15.4081	5.13337	12.6482
p-value	0.00872523	p-value	0.0448713	p-value	0.00579394	p-value	0.0082884	p-value	0.00224557
Figure 3G
pMCM3 / GAPDH				CDK1 / GAPDH				pMCM3 / GAPDH				DNA-PK / GAPDH
B6 no treatment	KI no treatment	KI ctrl-siRNA	KI CDK1-siRNA	B6 no treatment	KI no treatment	KI ctrl-siRNA	KI CDK1-siRNA	B6 no treatment	KI no treatment	KI ctrl-siRNA	KI DNA-PK-siRNA	B6 no treatment	KI no treatment	KI ctrl-siRNA	KI DNA-PK-siRNA
0.970228	6.28935	5.20655	1.76837	1.2517	1.43992	1.3969	0.567878	1.1064	5.64996	6.06227	3.16691	1.18403	0.974764	1.36913	0.381387
0.632451	7.53008	7.21572	1.53633	0.96921	1.02375	1.08711	0.466342	1.02378	5.4206	5.62209	0.854138	0.883838	1.33847	1.60276	0.2683
1.39732	9.20735	6.7692	1.17792	0.779091	0.850217	0.900372	0.50919	0.869826	6.53061	6.72984	2.40844	0.932133	1.01969	1.13671	0.392714
	Comparison	p.adj			Comparison	p.adj			Comparison	p.adj			Comparison	p.adj
	KI-B6	0.000105599			KI-B6	0.000153422			KI-B6	2.08389e-06			KI-B6	0.865395
	KI+CDK1-si-B6	0.913438			KI+ctrl-siRNA-B6	0.000103687			KI+ctrl-siRNA-B6	4.50381e-06			KI+ctrl-siRNA-B6	0.122425
	KI+ctrl-siRNA-B6	0.000478112			KI+DNAPK-si-B6	0.28104			KI+DNAPK-si-B6	0.773314			KI+DNAPK-si-B6	0.0082861
	KI+CDK1-si-KI	0.000183876			KI+ctrl-siRNA-KI	0.965179			KI+ctrl-siRNA-KI	0.516428			KI+ctrl-siRNA-KI	0.341312
	KI+ctrl-siRNA-KI	0.39419			KI+DNAPK-si-KI	0.000990492			KI+DNAPK-si-KI	1.27934e-06			KI+DNAPK-si-KI	0.00321195
	KI+ctrl-siRNA-KI+CDK1-si	0.000921323			KI+DNAPK-si-KI+ctrl-siRNA	0.000615062			KI+DNAPK-si-KI+ctrl-siRNA	2.6611e-06			KI+DNAPK-si-KI+ctrl-siRNA	0.000466013
			pMCM3	GAPDH	CDK1	GAPDH				pMCM3	GAPDH	DNA-PK	GAPDH
