# Supplementary material for: DNA damage in embryonic neural stem cell determines FTLDs’ fate via early-stage neuronal necrosis
Source: Life Sci Alliance. 2021 Jun 15;4(7):e202101022. doi: 10.26508/lsa.202101022 (PMC9715434; doi:10.26508/lsa.202101022)
Supplement: Supplementary file 12 [file LSA-2021-01022_SdataF5.xlsx]

## Sheet: Figure5
Figure 5
Figure 5B						Figure 5C
	VCP_T262A-KI					b-actin
	1m	3m	6m	12m
#1	3	2	0	3
#2	2	5	1	0
#3	1	2	1	3
#4	2	3	2	1
#5	3	2	2	1
#6	3	3	3	1
#7	2	2	2	2
#8	1	1	1	2
#9	1	1	1	1
#10	2	2	2	1
#11	1	3	3	1
#12	1	2	3	2
#13	1	3	1	3
#14	0	2	3	1
#15	2	3	1	1
#16	0	4	2	1
#17	3	4	3	2
#18	2	2	3	1
#19	2	2	2	1
#20	1	4	2	0
#21	2	3	1	1
#22	2	3	3	1
#23	2	3	1	3
#24	3	4	1	3
#25	0	2	2	1
#26	3	5	3	1
#27	1	5	2	2
#28	0	4	2	1
#29	0	4	0	1
#30	0	1	1	1
average	1.53333	2.86667	1.8	1.43333
SE	0.19018	0.212988	0.168836	0.156714
