# Supplementary material for: DNA damage in embryonic neural stem cell determines FTLDs’ fate via early-stage neuronal necrosis
Source: Life Sci Alliance. 2021 Jun 15;4(7):e202101022. doi: 10.26508/lsa.202101022 (PMC9715434; doi:10.26508/lsa.202101022)
Supplement: Supplementary file 13 [file LSA-2021-01022_SdataFS12.xlsx]

## Sheet: SupFigS12
Supplementary Figure S12
Open-Field							Light-dark test							elevated plus maze test							rotarod test																	morris water maze test
1M							1M							1M							1M																	1M
B6	VCP	PGRN	CHMP2B	TDP43			B6	VCP	PGRN	CHMP2B	TDP43			B6	VCP	PGRN	CHMP2B	TDP43			B6			VCP			PGRN			CHMP2B			TDP43					B6					VCP					PGRN
7505.3	4817.5	6624.5	8488	4260.7			184.5	126.5	230	149	270.5			13	3	0	5	4			day1	day2	day3	day1	day2	day3	day1	day2	day3	day1	day2	day3	day1	day2	day3			day1	day2	day3	day4	day5	day1	day2	day3	day4	day5	day1	day2
6350	5339.2	3850.7	5537	6175			296.5	295.5	149	320	284			3	0	0	5	5			270	192.25	401.25	248.5	588.25	568	351.75	600	600	311	532	490	518.75	600	600			40.125	43.125	10.625	6.625	31.75	48.25	17.125	6.5	9.125	6.875	23.625	12
6011	5099.8	4420.1	5382.9	6910.8			128.5	232	173	176.5	283.5			1	-2	0	3	-2			268.5	223.25	483.25	277.25	577	574.5	461.5	499.75	561.25	323.5	354.5	437	404	439.75	600			54.25	52.75	17.75	17.5	19.625	59	26.625	9.875	18.125	7	33.25	22.625
5567.3	4963.4	7228.5	3824.1	5940.1			222.5	221	178.5	181	120.5			15	6	-1	2	2			420.25	600	600	328	445.5	600	343.75	541.25	507.25	296.25	552	485.75	336.25	600	407.25			60	27.125	10	14.875	7.875	58.5	20.5	25.5	20	4.75	41.625	47.5
8276.6	6429.1	6687.9	4670.1	6918.4			235.5	195.3	221.5	318.5	108			8	6	3	-5	3			258	362	393.25	408.5	505	553	460	600	600	225.5	457.75	452	501.25	600	600			57	60	8.375	23.875	8.875	45	29.875	29	22	20	27.5	34.125
4993.2	5537.8	4409.4	4388.5	5375			169.5	274.1	309	438.5	308.5			5	4	2	-5	15			215.75	514	471.75	215.6	466.7	336.7	444.25	600	600	369.25	492	460.25	280.25	520	514.75			60	47.875	31.5	21.625	13.125	55	40	35	20	16	47.375	38
5059.1	6145.6	7445.6	4861.6	7202.8			230.5	201.3	250	97	274.5			3	3	6	-5	7			308.25	442.75	512.75	344.1	310.3	570.9	162.5	217.25	397.25	332.5	467	475.25	363.75	232.5	471.25			47	25.875	16.625	26.75	8.375	48	51	36	27	21	47.75	43.125
5217.8		5668.5	3684	3583.4			198		324.5	114.5	242			5		1	-5	7			327	281.25	359.5	401	393.7	456.1	385	440	462	269.5	506		114	446.5	206			60	57.5	31.375	13.375	47.875		45				52.125	49.75
5353.4		6098.7		4803.8			252		337.5		146			-2		10		2			388.25	446.75	554.5				523.5	554.5	600	347.25	274.25		435.75	600	600			39.75	44.5	26.25	22	4.5						60	15.375
5228.7		8630.7		3998.8			233.5		250		184.5			1		8		-4			460.5	345	384.75				268	434.75	576.5				452.75	600	600			49.875	20.625	42.05	11.175	7.075						26.875	34.25
8163		5426		6524.4			176		160		235.5			-9		11		5			313.75	431.75	375				380	600	577.5				389.75	600	600			50.875	33.5	9.625	14.125	5						50.875	46.75
3553.4		5963.2					236		219.5					0		10					351	600	600										332.75	381.5	600			43.75	46	20.5	12.625	15.75						33.75	17.5
5188.4							214.5							2							265.25	497.75	530.25															60	29.25	17.625	17.75	4.625						48	25.375
6103.2							128							3							170.25	561	600															51.75	31.875	17	8.5	5.375
7361.1							167.5							8							476.25	600	600															36.25	23.875	19.625	2.375	6.625
4697.5							142							13							385.5	429.5	526.5															60	38.75	16.625	21.75	9.125
5032.1							174							6							393.5	589	600															53.875	16.5	9.625	15.875	7.625
5791.4							200.5							3							215.75	551	600															60	27.25	23.5	14	28.5
8309.3							211							-9							280.25	573	600															51.875	36	19.625	7.75	4.5
5958.6							181							0							236.25	451.75	600															39.875	10.125	13.75	5.375	46.75
6449.2							155							2							242.25	508.75	546.5															38	24	21.75	25.5	3.25
6577.7							213.5							3							281.75	472.25	452.75															56.75	50.25	33.125	5.625	30
8139.7							238.5							2							284.5	317.5	321.75															29	30.875	40.25	31.125	22.25
4574.1							235							-6							341.5	520.5	473.5															60	56.375	53.75	22.25	6.625
2934.3							249							3							353.5	524.25	600															60	51.375	13.75	23.375	8.25
2971.5							137.5							8							428.75	600	600															60	38.5	40	24.8333	33.125
3172							184							-14							307	343	287															46	17.5	8.75	15.5	9.625
5281.8							176							-7							353	387.25	456.5															40.875	39.75	18	12.375	9.625
4105.3							179.5							7							324.75	535.25	477.25															48.5	58.5	48	16.75	10.25
6006.6							326							-3							431	600	600															10	9.5	8.75	4.75	4.5
2199.3							104							3							339	443.75	564.75															33	29.625	43	29	15.75
							161.5							6							192.75	457.25	417.75															30.25	17.5	29.25	18.375	6.625
	0.837785	0.339103	0.477543	0.909128	t.test vs B6		305														318.839	464.573	502.919	317.564	469.493	522.743	378.025	508.75	548.175	309.344	454.438	466.708	375.386	510.932	527.205	average		60	14.25	10.6667	15.375	9.75
31	7	12	8	11	n number		78.5								0.722636	0.287739	0.175715	0.373065	t.test vs B6		14.1719	20.4759	17.3814	27.9607	37.3504	35.5178	33.2851	38.2552	22.2251	16.1211	33.3348	8.40372	34.0998	37.072	37.8924	SEM		55.375	51.875	8	8.5	17
														32	7	12	8	11	n number					0.968425	0.910332	0.628032	0.126872	0.325257	0.123642	0.663149	0.799686	0.069221	0.148587	0.289375	0.569192	t.test vs B6		39.5	5.625	43.5	42.625	31.875
3M								0.343714	0.102298	0.560386	0.294889	t.test vs B6									31	31	31	7	7	7	10	10	10	8	8	6	11	11	11	n number
B6	VCP	PGRN	CHMP2B	TDP43			34	7	12	8	11	n number		3M																								48.3382	34.3529	23.0174	16.8789	14.7485	52.2917	32.875	23.6458	19.375	12.6042	41.0625	32.1979
6124.3	5466.3	4556.6	7248.1	7012.3										B6	VCP	PGRN	CHMP2B	TDP43																				2.04409	2.66765	2.25641	1.49188	2.08706	2.44133	4.81951	5.15514	2.39748	2.95882	3.38682	3.85354
5617.7	6834.8	6205.4	6283.4	7598.6			3M							8	7	-3	15	7			3M																						0.235569	0.793886	0.91419	0.398746	0.565881	0.0810759	0.650095
7099.8	4865.5	6475.3	8529.7	6278			B6	VCP	PGRN	CHMP2B	TDP43			8	2	6	12	-2			B6			VCP			PGRN			CHMP2B			TDP43					34	34	34	34	34	6	7	6	6	6	12	12
7454.9	7281.4	6130.4	6454.4	6907.3			138	180.5	165	385	183.5			4	2	-4	7	4			day1	day2	day3	day1	day2	day3	day1	day2	day3	day1	day2	day3	day1	day2	day3
5558.1	8828.7	5237.6	7224	6600.1			127.5	239.5	180.5	229.5	316.5			4	0	-5	1	3			174.25	333.75	541.75	400	600	600	242.5	313.75	262.5	24	166.5	222	129.75	197.812	224.25			3M
5661.6	6818	8159.9	7144.5	5815.6			214	102.5	189.5	270	178			5	-7	19	-3				226	276.25	183.5	226.25	339.5	573.5	293.25	480.25	568.75	42.5	115.75	133.25	163	341	600			B6					VCP					PGRN
6235.9	17532.2	7129.9	6372.6	6732.4			181.5	175.5	215	255	340			-3	-4	10					230.75	401.25	354.5	102.75	214.5	334	126.75	224.5	429.75	132	201.5	354.5	161.75	171.25	257			day1	day2	day3	day4	day5	day1	day2	day3	day4	day5	day1	day2
3426.3	6237.6	6519.5	7555.9	8219.7			211.5	234	169	218.5	185			-2	-4	3					351	357	428.5	212.75	317.25	513.75	140.75	255	490.25	215.5	380.25	600	187.75	442.5	389			46.4	12.5	27.2	28.5	14.6	56.625	32.25	14.5	19.25	12.375	47.6	17
6455.7	6228.5	5332.4	2406.7	6777.6			125	312.5	207	169	164			4	2	-4					143.25	179	113.75	185	289.75	258.25	238.25	383.75	217.25	245.5	528.5	478.5	187.75	305	377.5								58.875	47.5	35	37.625	33	52.8	60
5231.5	6842.5	5087	4794.9				256	144	189	202.5	212.5			16	9	4					186.5	250	292	188.5	201.25	334.75	86	139.25	173.5	252.75	327.25	467.25	298.75	412	532.75			27.2	17.2	9.4	3.5	3.8	60	17.875	24.875	16.875	5.625	55.4	16.2
9336.1		5354.3	5203.1				170.5	197	166.5	185	266			0	8						138.25	202.25	289	306.25	600	526	232.75	429.5	548.5	264	288.25	551.75	237.75	262	231.75			60	23.4	10.4	10.4	8.8	47.375	38.625	36.75	13.875	12.25	40.4	33.4
7890.4			5250.4				244	41	171	119.5	180.5			0	2						134.5	332.5	412.75	86.75	302.75	517.75	237.75	373.25	521.75	323.75	444	581.75	186.5	310.75	361.75			60	47.8	23.5	19.8	35.2	60	60	21.25	21.5	49	37.5	17
7890.4							266.5	307	160	250.5				5							182.5	350.25	441.5	197.25	335.5	251.75	257	253.25	302.25	181.75	161	224	233.5	423.5	432.5			60	34	32.4	60	50.9	41.75	15.5	6.5	5.125	4.75	60	37.6
6364							266.5	201.5	234	179				3							259.75	600	600	153.25	281.5	310.25	135.25	369.25	600	371.5	471.5	520						47	37.5	39.2	26.2	35.4	60	60	22.5	38.75	22.375	60	60
5059.5							138.5			161				0							338.5	425.25	600	190.25	325	313	276.5	600	518.5	147.25	208.25	320						34.625	48.25	17.75	19.75	28.875	50.25	18.5	5.25	9	15.625	46.2	15.9
6480.1							182.5							19							190.75	491.25	540.25															60	33.625	17.375	7.625	6	60	13.625	59.25	22.5	31.125
4203.6							239.5							3							150	279.75	226.75															60	40.5	39.875	40.875	46.125	37.375	51.75	34.125	14	11
5121.5							160.5							-1							203.25	349.5	394.25															41	28	39.75	6.75	12.125	60	38.875	34.625	37.875	14.5
4190.6							277.5							14							170.25	255.25	236															48.25	28.5	40	9.875	27.75
7314.5							243.5							13							142	257	306.25															50.625	16	42	9.625	22.75
7103							262							16							260.25	471	600															36.875	26	12.375	15.95	18.65
6804.3							241.5							11							495.25	600	600															36.5	47.25	11.95	9.15	8.525
5521.5							210.5							7							463.5	600	600															49.875	20.625	42.05	11.175	7.075
6080							185.5							19							121	210	278.75															47.625	26.875	13.875	7.875	10.25
8482.5							141.5							-20							40.75	130.25	423.75															46.375	40.625	60	41.5	33.625
5424.7							145							-5							192.25	357	578.5															60	60	28.75	18.875	24.5
9425.6							217.5														354.25	581.25	558.5															60	58.25	24	35.125	41.75
6222.8							234.5								0.134297	0.493614	0.744649	0.425964	t.test vs B6		262.75	293.75	363.75															52.375	20.375	35	7.5	8.875
							158							25	11	9	5	4	n number		184.5	233.75	417.25															60	44	13.125	8.625	22.875
	0.279509	0.432833	0.793276	0.14969	t.test vs B6		125														268.25	216.75	481.75															60	56.625	21	16.25	8
28	10	11	12	9	n number		94.5							6M																								33.875	20.375	10.375	5.75	6.625
														B6	VCP	PGRN	CHMP2B	TDP43			225.548	347.462	417.808	204.455	346.091	412.091	206.068	347.432	421.182	200.045	299.341	404.818	198.5	318.424	378.5	average		60	36.25	15	12.5	9.125
6M														0	-4	3	4	1			4.02691	5.30577	5.62833	7.96952	12.1251	12.1112	6.37813	11.7701	13.9849	9.85168	12.8207	14.7479	5.62843	10.7821	14.5006	SEM		60	37.875	21.875	21.625	25.75
B6	VCP	PGRN	CHMP2B	TDP43				0.9746	0.476538	0.298397	0.236299	t.test vs B6		0	-30	-4	5	10						0.534918	0.977727	0.908928	0.514191	0.999507	0.951353	0.516934	0.351974	0.821525	0.31738	0.498987	0.461985	t.test vs B6		60	57.375	21.125	4.375	12.625
5203.2	7278.9	3975.6	4717.7	5391.8			28	11	11	12	9	n number		4	1	13	3	10			26	26	26	11	11	11	11	11	11	11	11	11	9	9	9	n number		60	19.5	23	35.5	49.375
4592.4	10303.2	3232.7	5290.5	7556.2										2	8	-13	9	9																				60	44.375	42.375	24.625	23
5371.7	8321.3	4367	6431.7	6444										22	-4	9	10	3			6M																	51.375	26.375	28.5	11.375	14.875
5372.2	5038	4717.1	7088	7989										-4	17	-7	1	5			B6			VCP			PGRN			CHMP2B			TDP43					60	45.125	37.75	17.375	29.375
4678	5540.2	7213.8	5017.9	6768.8			6M							0	4	6	6	5			day1	day2	day3	day1	day2	day3	day1	day2	day3	day1	day2	day3	day1	day2	day3
5109.1	6360.1	6903.2	7501.7	5891.6			B6	VCP	PGRN	CHMP2B	TDP43			3	-2	33	4	6			122.75	362.5	600	77.5	517.5	571.75	207.25	385.25	550.5	110.25	217	358.25	140	202.25	210
6489.7	6363.7	4160.8	6823.2	5937			185	60.5	225	196	200.5			4	10	7	0				150.5	238.5	261.5	44	208	366.5	176	288	264.5		160.25	223.75	97	156.75	159			51.6658	35.1717	26.6992	18.2683	21.5733	53.8409	35.8636	26.7841	21.4886	19.2386	49.9875	32.1375
3340.1	8968.3		5886.9	7130.2			268.5	181.5	154.5	126	135			0	4		6				454	438.75	491.25	265.75	458.5	600	152.5	278.25	352	165.25	274	298	126.5	173	180.75			1.83211	2.5099	2.33847	2.43535	2.53118	2.51321	5.32318	4.68548	3.55726	4.06853	3.00478	6.76126
6969.8	5101.4		6659.8				190.5	132.5	295	144	136.5			-1	10						142.75	213.75	227	80	131.75	144.5	193.5	422.25	498		247	300	96.25	139.5	128								0.491873	0.907995	0.987271	0.463739	0.631873	0.641508	0.683815
6245.2	6752.2		7515.9				304.5	46.5	207.5	199	211			2							363.75	600	596	286.75	380	561.5	358.5	432	509		191	144.625	149.75	205.5	261			30	30	30	30	30	11	11	11	11	11	8	8
6205.4							236.5	181.5	212	149.5	197			17							154.25	139	102.75	68.5	206.25	170.25	71	155.75	205.75	108.75	179.25	169.75	119.25	189	150.25
5692.1							254	173.5	152.5	219	189			6							137	438.75	448.25	167.75	155	196.5	226	266.25	269.5	190.5	407.75	546.5	174.75	178.75	146.5
6175.1							268.5	120	141.5	137.5	125			1							151	164.5	310.25	162	176	308	335	594.5	457.25		187.25	243.5	184	169.75	165.75
6750							223	184.5	219	168.5	118.5			2							112.75	331	406	203.75	357.75	317.5				169.25	241.25	251	228	294	359.75
6170							165.5	169.5	208	235				11							81.25	109	195.75	78	112.75	131.5				185.25	295.5	493.5	236	449.75	507.25			6M
3745.7							269	192		217				4							210.75	261.25	298.75	156.5	423	459.75							216.75	488.75	420.75			B6					VCP					PGRN
4627.5							193.5							5							174.25	364.75	269.5										416.5	600	600			day1	day2	day3	day4	day5	day1	day2	day3	day4	day5	day1	day2
6319.9							318.5														163.5	207.25	185.375										232.25	277.5	222			44	55.9	17.4	8.25	12.6	60	55.625	53.625	60	17.75	59	47.875
4882.5							274.5								0.488339	0.816107	0.696532	0.290158	t.test vs B6		117.5	219.75	228.5															43.8	25	7.4	7	19	60	52.25	32.5	60	31.5	45.5	45.375
5351.4							184							19	11	9	10	8	n number		155	238.25	262.75															41.5	20	10.6	11.2	6.1	60	35.625	22.875	25	5.75	60	22.375
							165.5														131.5	191	182.75															48.8	31.9	24.6	6.1	4.6	53.75	37.875	23.5	38.625	33	42.8	49.4
							256.5														189.25	384.25	445.75															58.4	60	9.5	9.4	9	39.25	59.5	24.375	7.25	2.5	60	25.1
							276														179.5	442	489															60	17.9	15.5	12.8	13.1	42.625	46.125	48.375	11.875	21.875	47.1	60
							197.5							12M							208	179	172.25															41.5	19.9	11.4	18.8	11.4	37.75	17.375	25.625	25.625		60	20.2
	0.0230457	0.41739	0.0472984	0.00836349	t.test vs B6		239							B6	VCP	PGRN	CHMP2B	TDP43			78.5	141	229.25															60	46.375	19.125	6.75	4.25	46.5	20.75	29.25			40.5	36.9
20	10	7	10	8	n number		284							0	11	-7	0	3			240.75	514	600															47.75	48.875	7.875	10.25	21.25
							294.5							6	3	19	5	4			240.75	217.25	350															52.2	46.4	22.9	18.5	34.5
12M							95							1	7	7	3	7			59.25	249	345															28.8	10.5	10	8.2	13.2
B6	VCP	PGRN	CHMP2B	TDP43			325							9	5	34	4																					49.5	27.75	30.5	7.5	6.875
5878.5	6499.8	5978.5	5906.7	7816.8			167.5							-2	11	13	4				174.717	288.891	334.679	144.591	284.227	347.977	214.969	352.781	388.312	154.875	240.025	302.887	185.923	271.115	270.077	average		60	31	18	13.75	4
3775.7	5966.3	6188.3	6643.5	8016.2			261							1	21						18.4706	27.4537	30.914	24.9337	43.8573	53.7116	33.2197	47.5553	46.6269	14.8604	23.1397	41.3699	23.7524	41.0308	42.5821	SEM
3374.8	3903.9	3237.1	4644.2	9175			165.5							3	10									0.342604	0.929164	0.832668	0.311083	0.267198	0.354368	0.412017	0.184064	0.545324	0.712626	0.72213	0.231317	t.test vs B6
2170.5	5938.5	2640	7355.4				167.5							6	4						23	23	23	11	11	11	8	8	8	6	10	10	13	13	13	n number
3499	4420	6570.1	5407				236							5	0
4728.4	6589.5	9230.1	5906.5				122							5	2																							48.9423	33.9615	15.7538	10.6538	12.2981	49.9844	40.6406	32.5156	32.625	18.7292	51.8625	38.4031
4895.9	3953.3		6951.7				110							0																								2.57701	4.40243	1.98642	1.17458	2.39112	3.39728	5.53366	4.21681	8.04211	5.19439	3.05894	5.16369
5104.9	4113.6		4669				77.5							0																													0.251781	0.209421	0.0204539	0.017363	0.353244	0.112968	0.338875
2617.2	7022.1		4753.4																																			14	14	14	14	14	9	9	9	8	7	9	9
5822.6	6227.1		4253.4												0.0542886	0.200595	0.780588	0.286834	t.test vs B6		12M
5254.7	6736.3		3586.3					0.00189542	0.404729	0.0294333	0.00722499	t.test vs B6		12	10	5	5	3	n number		B6			VCP			PGRN			CHMP2B			TDP43
4415.8	5452.9						31	10	9	10	8	n number									day1	day2	day3	day1	day2	day3	day1	day2	day3	day1	day2	day3	day1	day2	day3
	4080.2																				108.5	178.25	175	204.25	371.75	459.5	102.5	183	136	163.25	180	170.75	145.75
	5247.4																				259.5	237	450.5	349	373.75	299.25	88	70.25	70.5	124.25	167.75	163.25	62
							12M														151	412.5	425.5	227.75	350.75	600	80.75	96.75	114.5	111.75	216.5	198.75	196	221.5	291
							B6	VCP	PGRN	CHMP2B	TDP43										167.75	140	401	74.25	132.75	176.5	93.75	160.75	449.75	93.5	145.5	202.25	67	102.25	88			12M
							182	176	182	127.5	146										164.5	195.25	167.5	61.5	115.25	129	92.75	139	157.25	90.75	157.5	112	143.25	174.25	155.75			B6					VCP					PGRN
							185.5	100.5	129	123.5	154										102.5	143.75	169.75	136	194.5	199.5				103	183.25	174.75	166.25		226.333			day1	day2	day3	day4	day5	day1	day2	day3	day4	day5	day1	day2
							298.5	187.5	193	102.5	278.5										171	172	249.75	157	174.25	196.5				167.25	524.5	471.25	117	199	143.75			52.875	19.725	24.625	10.3333	20.375	40.125	50.625	60	36.3333	60	47.25	60
							300	122.5	151.5	272.5	77.5										120.5	192	200.75	90.75	211.75	209.5				114.5	231.75	263.75						33	12	6.125	17	7.625	34.875	46.75	32.5	60	59.75	28.125	42.375
							208.5	177		223.5	76										129.25	241.75	361.5							220.5	254.25	268.75						51.75	16.25	36.125	26.25	4.625	50.875	36.75	38.125	16.25	19.5	60	45.25
							195	125.5		139.5	157.5										104.25	185	163.25							196.25	288.25	594.5						60	25.25	19.125	24.5	7.875	52.625	51.375	20.375	27.375	10.875	56.625	49
	0.021521	0.242019	0.0304125	0.000610924	t.test vs B6		409	145.5		158.5	118										108.75	202	185.25							83	130.25	192.5						40.875	39	19	27.25	8.5	58.375	34.25	53.125	36.625	16	60	40.1667
12	14	6	11	3	n number		190.5	140													142	253.25	250.75															53.375	27.125	33.375	22.125	6.125	46.625	48	33.625	34.75	21.625	51.125	52.125
							224	148.5													139.5	216.75	266															60	53	35.375	18.375	18.625
								157													98.75	228.75	248.25															46	20.125	4	7.625	4
							170.5														131.75	214.25	315															29.125	34.75	23.875	13.5	14.8333
																																						28.625	18.375	10.875	9.875	6.125
																																						60	29.5	7.25	18	7.875
																					139.967	214.167	268.65	162.562	240.594	283.719	91.55	129.95	185.6	133.455	225.409	255.682	128.179	174.25	180.967	average		54.125	29.125	29	11.625	4.125
																					10.6134	16.5817	25.6827	33.9781	38.2114	57.7581	3.57369	20.6291	67.5804	13.9344	33.2446	44.1632	18.7924	25.8668	35.2344	SEM
																								0.542495	0.540448	0.816466	0.00048455	0.0101801	0.300671	0.713941	0.766354	0.802745	0.596906	0.243439	0.0763681	t.test vs B6
																					15	15	15	8	8	8	5	5	5	11	11	11	7	4	5	n number
								0.00525408	0.024459	0.0476572	0.0204881	t.test vs B6
							10	10	4	7	7	n number
																																						47.4792	27.0188	20.7292	17.2049	9.22569	47.25	44.625	39.625	35.2222	31.2917	50.5208	48.1528
																																						3.42053	3.2672	3.3512	1.9458	1.61564	3.51233	2.98399	5.93568	5.88469	9.16007	4.93155	2.9577
																																											0.963404	0.00126693	0.0233498	0.0264807	0.0607695	0.623363	0.000249396
																																						12	12	12	12	12	6	6	6	6	6	6	6
[truncated: 47 more columns]
