# Supplementary material for: DNA damage in embryonic neural stem cell determines FTLDs’ fate via early-stage neuronal necrosis
Source: Life Sci Alliance. 2021 Jun 15;4(7):e202101022. doi: 10.26508/lsa.202101022 (PMC9715434; doi:10.26508/lsa.202101022)
Supplement: Supplementary file 14 [file LSA-2021-01022_SdataFS13.xlsx]

## Sheet: SupFigS13
Supplementary Figure S13
SupFig S13A
brain weight
	1M						3M						6M						12M						18M
	B6	PGRN-KI	TDP43-KI	VCP-KI	CHMP2B-KI		B6	PGRN-KI	TDP43-KI	VCP-KI	CHMP2B-KI		B6	PGRN-KI	TDP43-KI	VCP-KI	CHMP2B-KI		B6	PGRN-KI	TDP43-KI	VCP-KI	CHMP2B-KI		B6	PGRN-KI	TDP43-KI	VCP-KI	CHMP2B-KI
	0.4372	0.4447	0.4294	0.4163	0.4096		0.4665	0.4838	0.505	0.4651	0.4998		0.4555	0.49447	0.4966	0.4837	0.461		0.4848	0.4925	0.5266	0.4795	0.4766		0.49	0.4675	0.4934	0.4627	0.5022
	0.4658	0.3894	0.4198	0.3823	0.4329		0.4599	0.523	0.5013	0.4267	0.4528		0.4415	0.4952	0.5081	0.4903	0.481		0.5058	0.5015	0.5063	0.4946	0.4654		0.512	0.5029	0.4798	0.4572	0.5039
	0.4621	0.4362	0.4232	0.3499	0.4553		0.4732	0.4735	0.4975	0.4311	0.4706		0.5119	0.4803	0.494	0.5015	0.4715		0.4927	0.4875	0.4967	0.5046	0.5265		0.4919	0.4971	0.51	0.535	0.4872
	0.4627	0.4288	0.4284	0.3412	0.418		0.506	0.4662	0.5125	0.4587	0.47		0.4872	0.4917	0.5193	0.4954	0.4619		0.5059	0.483	0.5206	0.5147	0.4627		0.5134	0.5091	0.4849	0.4943	0.4914
	0.4612	0.4248	0.463	0.4084	0.4664		0.5033	0.5035	0.4867	0.4095	0.4446		0.5152	0.4803	0.4637	0.5218	0.4428		0.5274	0.4924	0.5115	0.5119	0.4549		0.4746	0.4966		0.5024	0.4644
	0.4288				0.457		0.5186		0.5095	0.4405	0.4745		0.4988		0.4557	0.4925	0.4869		0.4911		0.4359	0.5163	0.4922		0.4888			0.4534	0.4755
	0.5058						0.4999		0.4999	0.473	0.4651		0.564		0.4645	0.4933	0.4525						0.4609		0.5078			0.4593	0.4394
	0.5028						0.5055				0.4328		0.5272		0.4916	0.4577	0.4606						0.4849		0.4592			0.4981	0.4759
	0.44						0.4844						0.4422			0.4842	0.4707						0.4741		0.5294			0.5256	0.4928
	0.47						0.4611						0.445			0.4735							0.4743		0.4754			0.4875	0.4704
	0.472						0.5033						0.4983			0.5129							0.4754		0.519			0.5113
	0.4783						0.5197						0.5212			0.5711							0.4858		0.4973			0.4346
	0.4493						0.5092						0.5192										0.4953		0.4722
	0.454						0.512						0.4832										0.5166		0.453
	0.4804						0.4987						0.4813
	0.4605						0.505						0.5225
	0.5234						0.4793
	0.4909						0.4793
	0.5061
	0.5009
	0.507
1M						3M						6M						12M						12M
	B6	PGRN-KI	TDP43-KI	VCP-KI	CHMP2B-KI		B6	PGRN-KI	TDP43-KI	VCP-KI	CHMP2B-KI		B6	PGRN-KI	TDP43-KI	VCP-KI	CHMP2B-KI		B6	PGRN-KI	TDP43-KI	VCP-KI	CHMP2B-KI		B6	PGRN-KI	TDP43-KI	VCP-KI	CHMP2B-KI
average	0.474248	0.42478	0.43276	0.37962	0.439867	average	0.493606	0.49	0.501771	0.443514	0.463775	average	0.494638	0.488394	0.486687	0.498158	0.465433	average	0.501283	0.49138	0.4996	0.5036	0.481829	average	0.491714	0.49464	0.492025	0.485117	0.48031
SEM	0.00571836	0.00947399	0.00775923	0.015067	0.00944901	SEM	0.00457454	0.0103643	0.00321594	0.00868613	0.00725492	SEM	0.00881314	0.00335555	0.00810519	0.00820277	0.00456849	SEM	0.00625265	0.00308211	0.0134445	0.00582008	0.00549869	SEM	0.00613213	0.00715469	0.00661569	0.00907725	0.00617312
t.test (vsB6)		0.000150271	7.69958e-05	0.000316827	0.00142235	t.test (vsB6)		0.761702	0.158067	0.000537491	0.00415343	t.test (vsB6)		0.516213	0.51423	0.772293	0.00771954	t.test (vsB6)		0.197279	0.912769	0.791779	0.0364285	t.test (vsB6)		0.76237	0.973286	0.553812	0.203981
SupFig S13C						SupFig S13F
gH2AX	53BP1	pCDK1	pDNAPK	pThr719-MCM3			B6	CHMP2B-KI	PGRN-KI	VCP-KI	TDP43-KI
						#1	0.406451	0.237992	0.164118	0.0645104	0.271266
						#2	0.39622	0.236914	0.115023	0.189147	0.281519
						#3	0.399372
							B6	CHMP2B-KI	PGRN-KI	VCP-KI	TDP43-KI
						Student's t-test (vs. B6)		3.06254e-05	0.000796489	0.00983804	0.000186082
						Tukey's HSD test (vs. B6)		0.0205244	0.00191822	0.00148237	0.0661175
SupFig S13G
YAP	b-actin
