# Supplementary material for: DNA damage in embryonic neural stem cell determines FTLDs’ fate via early-stage neuronal necrosis
Source: Life Sci Alliance. 2021 Jun 15;4(7):e202101022. doi: 10.26508/lsa.202101022 (PMC9715434; doi:10.26508/lsa.202101022)
Supplement: Supplementary file 16 [file LSA-2021-01022_TableS1.xlsx]

## Sheet: PKCs 4FTLD+4AD+Tau
List of PKC phosphorylation sites changed in cerebral cortex of AD and FTLD mouse models (p<0.05 by student's t-test)
									FTD															AD
									CHMP2B			PGN			TDP43			VCP			Tau			5xFAD			APP			PS1			PS2
UniProt Accession	Gene Symbol (UniProt)	Gene Name (NCBI)	Full Name	KEGG ID	Age	Position	Amino acid	P-site	Number of peptides	Mean Ratio	P-value (vs. Control, t-test)	Number of peptides	Mean Ratio	P-value (vs. Control, t-test)	Number of peptides	Mean Ratio	P-value (vs. Control, t-test)	Number of peptides	Mean Ratio	P-value (vs. Control, t-test)	Number of peptides	Mean Ratio	P-value (vs. Control, t-test)	Number of peptides	Mean Ratio	P-value (vs. Control, t-test)	Number of peptides	Mean Ratio	P-value (vs. Control, t-test)	Number of peptides	Mean Ratio	P-value (vs. Control, t-test)	Number of peptides	Mean Ratio	P-value (vs. Control, t-test)
P16054	KPCE_MOUSE	Prkce	Protein kinase C epsilon type	mmu:18754	1m	337	S	S337	15	1.05002	0.627315	11	1.74568	0.0188743	11	1.01802	0.882493	15	1.2322	0.00982689	7	0.721701	0.104348	3	1.43476	0.162066	3	1.45925	0.0202893	5	0.806951	0.374073	3	1.08073	0.29012
P16054	KPCE_MOUSE	Prkce	Protein kinase C epsilon type	mmu:18754	3m	337	S	S337	10	1.00824	0.918198	11	0.860268	0.193562	14	0.814985	0.388291	11	1.02684	0.794451	23	0.860776	0.319799	23	0.983793	0.755218	23	0.97019	0.65084	23	0.893977	0.0692069	24	0.75201	0.00121857
P16054	KPCE_MOUSE	Prkce	Protein kinase C epsilon type	mmu:18754	6m	337	S	S337	7	1.76133	0.0699885	5	1.34572	0.216897	10	0.910168	0.425725	6	1.37764	0.266467	25	1.05276	0.275056	23	1.01163	0.811851	22	1.06923	0.374437	25	0.959719	0.50751	25	0.756908	0.000152497
P16054	KPCE_MOUSE	Prkce	Protein kinase C epsilon type	mmu:18754	1m	346	S	S346	14	0.905758	0.0572592	11	0.759075	0.020027	5	1.25323	0.009096	13	1.29859	0.0113401	8	1.3664	0.0439296	5	1.7408	0.032436	4	2.04601	0.00978781	4	0.489201	0.000596591	4	0.557176	0.0505903
P16054	KPCE_MOUSE	Prkce	Protein kinase C epsilon type	mmu:18754	3m	346	S	S346	1	0.644396	---	1	0.548057	2	5	0.73246	0.107012	1	0.916264	---	13	0.950725	0.336777	14	0.919647	0.384436	15	0.924695	0.326378	13	1.2219	0.014544	16	0.961946	0.590581
P16054	KPCE_MOUSE	Prkce	Protein kinase C epsilon type	mmu:18754	6m	346	S	S346	8	0.876696	0.240895	9	1.28693	0.0123769	4	0.929096	0.754486	9	1.20012	0.252234	19	1.01939	0.780362	17	0.791969	0.00284289	16	1.01082	0.875642	18	1.01479	0.80221	18	0.855303	0.0181864
P16054	KPCE_MOUSE	Prkce	Protein kinase C epsilon type	mmu:18754	1m	350	S	S350	13	0.910759	0.132047	11	0.748722	0.0179463	1	1.24955	---	11	1.43748	0.0139679	0	---	---	0	---	---	0	---	---	0	---	---	0	---	---
P16054	KPCE_MOUSE	Prkce	Protein kinase C epsilon type	mmu:18754	3m	350	S	S350	0	---	---	0	---	---	1	0.901105	---	0	---	---	8	0.76254	0.125751	9	1.04483	0.812148	9	0.896882	0.138083	8	1.18712	0.0961716	10	1.00148	0.987844
P16054	KPCE_MOUSE	Prkce	Protein kinase C epsilon type	mmu:18754	6m	350	S	S350	1	1.2668	---	1	2.03866	---	1	1.19807	---	1	2.63869	---	9	1.12524	0.259645	7	0.846768	0.339844	5	1.24136	0.246092	8	1.04881	0.721029	7	0.810789	0.0224674
P16054	KPCE_MOUSE	Prkce	Protein kinase C epsilon type	mmu:18754	1m	368	S	S368	11	0.672755	0.0105267	11	0.936376	0.690498	0	---	---	11	0.828702	0.13745	20	1.15478	0.0504831	19	1.04441	0.532176	19	1.38457	4.81e-05	17	0.623406	4.41e-06	19	1.26404	1.45e-05
P16054	KPCE_MOUSE	Prkce	Protein kinase C epsilon type	mmu:18754	3m	368	S	S368	3	1.32376	0.0897079	3	1.27608	0.0709338	0	---	---	3	1.79095	0.205284	15	1.31539	3.61e-06	15	0.508509	5.08e-07	15	0.71759	1.41e-06	15	1.16252	0.00195611	15	1.07574	0.028538
P16054	KPCE_MOUSE	Prkce	Protein kinase C epsilon type	mmu:18754	6m	368	S	S368	0	---	---	0	---	---	0	---	---	0	---	---	5	0.927357	0.466526	5	0.984153	0.903779	5	1.10982	0.404096	5	0.847054	0.259662	5	0.777559	0.0607464
P16054	KPCE_MOUSE	Prkce	Protein kinase C epsilon type	mmu:18754	1m	388	S	S388	19	0.911524	0.137699	17	0.939261	0.178093	3	1.33679	0.497199	17	0.956295	0.446178	9	0.79598	0.00917854	8	1.22574	0.162189	8	1.28575	0.0399252	8	0.684275	0.000823027	8	1.18139	0.439499
P16054	KPCE_MOUSE	Prkce	Protein kinase C epsilon type	mmu:18754	3m	388	S	S388	17	1.18785	0.00986678	22	1.18248	0.01354	5	1.07451	0.711225	24	1.28113	5.83e-05	24	1.29748	0.00521958	24	1.0767	0.120559	24	0.980468	0.661568	24	0.969133	0.467222	24	0.905636	0.00955763
P16054	KPCE_MOUSE	Prkce	Protein kinase C epsilon type	mmu:18754	6m	388	S	S388	10	0.866064	0.19947	10	0.915264	0.236514	4	0.955071	0.924927	11	1.14355	0.221951	23	0.995796	0.912265	23	1.16513	0.0328081	23	1.15559	0.0193785	23	0.945888	0.245954	23	0.85418	0.00399963
P16054	KPCE_MOUSE	Prkce	Protein kinase C epsilon type	mmu:18754	1m	729	S	S729	12	0.340805	0.0487338	8	0.150522	0.0010079	1	1.18296	---	9	0.242373	0.000243971	2	0.668817	---	2	2.01401	---	2	1.03531	---	2	0.606971	---	2	0.897489	---
P16054	KPCE_MOUSE	Prkce	Protein kinase C epsilon type	mmu:18754	3m	729	S	S729	0	---	---	0	---	---	5	0.247741	0.00959235	0	---	---	7	0.492174	0.00829565	7	0.83927	0.229753	9	0.588521	0.0316911	9	2.49351	0.168356	4	0.573641	0.181265
P16054	KPCE_MOUSE	Prkce	Protein kinase C epsilon type	mmu:18754	6m	729	S	S729	0	---	---	0	---	---	2	0.803841	---	1	4.73068	---	5	0.720579	0.00892553	5	1.16823	0.337913	6	1.75404	0.0737707	7	1.16981	0.408149	5	0.455518	0.000279707
P16054	KPCE_MOUSE	Prkce	Protein kinase C epsilon type	mmu:18754	1m	710	T	T710	43	1.02997	0.654007	34	0.72018	0.000870769	67	1.05741	0.308345	51	1.51896	0.000248666	16	1.01049	0.895737	12	1.53951	0.000827859	6	0.663178	0.226266	12	0.912472	0.769504	5	1.857	0.455169
P16054	KPCE_MOUSE	Prkce	Protein kinase C epsilon type	mmu:18754	3m	710	T	T710	35	0.778904	0.00371595	38	0.710384	2.31e-06	63	0.964178	0.612133	38	0.847569	0.0317406	97	0.878323	0.00218087	91	1.03397	0.236046	94	1.12029	0.00426867	90	0.857676	0.00046789	85	0.702061	1.57e-07
P16054	KPCE_MOUSE	Prkce	Protein kinase C epsilon type	mmu:18754	6m	710	T	T710	24	0.636241	3.21e-07	26	1.04984	0.32294	75	0.807909	0.00373066	28	0.744137	0.000274455	43	0.725522	4.73e-07	34	1.1818	0.0524357	35	1.06487	0.146327	39	1.19221	0.00100692	40	1.42053	8.55e-06
P20444	KPCA_MOUSE	Prkca	Protein kinase C alpha type	mmu:18750	1m	319	S	S319	15	0.895403	0.0258424	15	1.21574	0.0480609	4	1.06542	0.621779	15	1.16129	0.0617435	13	1.04092	0.655428	10	1.54815	0.0304588	6	1.45507	0.0390879	8	0.862134	0.368082	10	1.1543	0.424202
P20444	KPCA_MOUSE	Prkca	Protein kinase C alpha type	mmu:18750	3m	319	S	S319	4	0.872768	0.273436	4	1.02264	0.846695	4	0.792129	0.0170628	3	1.05268	0.805541	3	1.42841	0.00171603	3	1.21703	0.224052	3	0.893978	0.568433	3	1.19998	0.0269462	3	0.975716	0.706896
P20444	KPCA_MOUSE	Prkca	Protein kinase C alpha type	mmu:18750	6m	319	S	S319	6	1.51304	0.00881576	6	1.21671	0.0327467	4	0.947084	0.687528	6	0.904313	0.573922	6	0.779577	0.075053	6	1.12869	0.442081	6	0.955098	0.523029	6	0.993284	0.903825	6	0.626053	0.0152288
P20444	KPCA_MOUSE	Prkca	Protein kinase C alpha type	mmu:18750	1m	497	T	T497	41	0.850998	0.190475	32	0.499337	3.01e-07	17	2.50873	1.65e-05	36	0.598049	1.13e-10	8	1.39339	0.0272066	5	0.579442	0.0106645	0	---	---	0	---	---	0	---	---
P20444	KPCA_MOUSE	Prkca	Protein kinase C alpha type	mmu:18750	3m	497	T	T497	0	---	---	1	1.04673	---	22	0.833459	0.183014	1	2.03404	---	64	1.08489	0.15647	66	0.941891	0.29215	57	0.64494	8.77e-09	64	0.910377	0.0377854	58	0.656563	3.18e-08
P20444	KPCA_MOUSE	Prkca	Protein kinase C alpha type	mmu:18750	6m	497	T	T497	1	0.592362	---	1	0.381777	---	19	1.41778	0.0619779	1	0.330609	---	15	0.938106	0.598067	10	1.19533	0.193208	12	1.5135	0.00117336	10	0.97747	0.847695	10	0.675723	0.00607937
P20444	KPCA_MOUSE	Prkca	Protein kinase C alpha type	mmu:18750	1m	638	T	T638	14	0.886434	0.0493825	15	1.09577	0.0393655	8	1.24347	0.572902	14	1.01166	0.820817	0	---	---	0	---	---	0	---	---	0	---	---	0	---	---
P20444	KPCA_MOUSE	Prkca	Protein kinase C alpha type	mmu:18750	3m	638	T	T638	0	---	---	0	---	---	17	1.06183	0.563835	0	---	---	16	1.00479	0.974089	13	0.260301	0.0093804	17	0.694446	0.0600858	18	0.961097	0.626307	18	0.908994	0.21987
P20444	KPCA_MOUSE	Prkca	Protein kinase C alpha type	mmu:18750	6m	638	T	T638	1	2.24594	---	1	1.4736	---	7	0.747428	0.127357	1	1.22134	---	32	0.987952	0.894398	29	0.909901	0.185258	33	0.948991	0.280165	34	0.933304	0.134069	38	0.85266	0.000320847
P28867	KPCD_MOUSE	Prkcd	Protein kinase C delta type	mmu:18753	1m	643	S	S643	29	1.00119	0.980878	29	0.7103	0.00014859	5	0.888803	0.655029	29	1.11607	0.0252295	17	1.1271	0.0449459	14	1.22814	0.075907	15	0.813283	0.0119883	15	0.752001	0.0442193	17	0.64168	0.0980327
P28867	KPCD_MOUSE	Prkcd	Protein kinase C delta type	mmu:18753	3m	643	S	S643	6	1.21274	0.0453278	6	0.848106	0.130149	7	2.01131	0.146808	6	0.99634	0.919311	21	0.93915	0.331237	21	0.918243	0.194617	21	0.86439	0.00125077	21	1.02526	0.45359	21	0.959364	0.379483
P28867	KPCD_MOUSE	Prkcd	Protein kinase C delta type	mmu:18753	6m	643	S	S643	7	0.795521	0.135378	8	1.29878	0.0320873	6	1.6829	0.00451048	8	1.47918	0.00522291	35	0.957574	0.316359	35	0.759701	7.99e-06	35	0.86734	0.000803113	35	1.0164	0.648487	35	0.97357	0.400706
P28867	KPCD_MOUSE	Prkcd	Protein kinase C delta type	mmu:18753	1m	662	S	S662	31	1.03333	0.526906	29	0.860225	0.0076079	23	1.26333	0.0785443	31	1.0479	0.377054	23	0.953377	0.398464	21	1.29001	0.00213735	18	0.709858	0.000438517	22	0.89629	0.178584	18	1.05996	0.725176
P28867	KPCD_MOUSE	Prkcd	Protein kinase C delta type	mmu:18753	3m	662	S	S662	20	1.05203	0.307645	20	1.10648	0.0484193	24	1.12482	0.605728	20	0.959208	0.390173	52	0.939617	0.0656158	51	0.983067	0.570008	50	0.977314	0.469882	49	0.921359	0.0282231	51	0.988974	0.7641
P28867	KPCD_MOUSE	Prkcd	Protein kinase C delta type	mmu:18753	6m	662	S	S662	21	0.835075	0.0991702	22	0.963664	0.722815	22	1.77233	3.66e-05	23	1.05714	0.591002	56	0.992476	0.866552	52	0.893669	0.0047859	56	1.10264	0.0668432	51	1.08842	0.0129448	53	1.14396	0.000203428
P63318	KPCG_MOUSE	Prkcg	Protein kinase C gamma type	mmu:18752	1m	330	S	S330	56	1.26182	0.000650364	40	0.905223	0.163248	12	1.29052	0.0771953	52	1.26958	0.0166806	13	0.735425	0.0118805	15	1.70516	0.000378125	8	1.07263	0.541695	12	0.892597	0.190564	4	0.677093	0.177232
P63318	KPCG_MOUSE	Prkcg	Protein kinase C gamma type	mmu:18752	3m	330	S	S330	3	1.26776	0.374117	3	1.13806	0.505715	8	1.03077	0.787787	4	1.08836	0.562148	45	1.09394	0.160516	49	1.06606	0.237325	49	1.0409	0.462597	47	0.981405	0.630735	47	0.874035	0.000772338
P63318	KPCG_MOUSE	Prkcg	Protein kinase C gamma type	mmu:18752	6m	330	S	S330	6	1.30438	0.0450553	5	1.10729	0.107116	7	0.876353	0.440086	6	0.859212	0.313608	48	0.970801	0.391807	50	1.08744	0.0647676	49	1.00605	0.881388	50	1.04566	0.255931	51	1.0584	0.240784
P63318	KPCG_MOUSE	Prkcg	Protein kinase C gamma type	mmu:18752	1m	687	S	S687	33	1.59245	0.0183207	26	1.18084	0.369051	45	1.29919	0.000134895	27	0.985255	0.913408	10	0.856733	0.319569	11	1.66089	0.000109294	11	1.39772	0.0130178	11	0.772306	0.140053	10	1.53631	0.0199826
P63318	KPCG_MOUSE	Prkcg	Protein kinase C gamma type	mmu:18752	3m	687	S	S687	54	0.811685	4.16e-10	53	0.812517	3.93e-24	51	1.06637	0.257676	53	0.805322	1.38e-22	34	1.13805	0.145142	38	0.859086	0.0471143	34	0.957132	0.604468	32	0.932573	0.271771	30	0.724519	0.000359693
P63318	KPCG_MOUSE	Prkcg	Protein kinase C gamma type	mmu:18752	6m	687	S	S687	21	1.50269	0.00389801	19	1.03493	0.724986	38	1.38234	0.040594	20	1.22716	0.144809	21	0.678702	0.00444696	22	0.993235	0.940493	23	1.12344	0.307928	26	0.971519	0.750965	24	0.809167	0.0110596
P63318	KPCG_MOUSE	Prkcg	Protein kinase C gamma type	mmu:18752	1m	690	S	S690	22	5.50305	1.54e-05	10	2.59177	0.0255861	27	1.24083	0.00633862	13	1.12294	0.703698	10	1.05127	0.756814	10	1.54501	0.00305656	10	1.46876	0.00149573	10	0.510203	0.00331029	10	1.33616	0.0283015
P63318	KPCG_MOUSE	Prkcg	Protein kinase C gamma type	mmu:18752	3m	690	S	S690	53	0.8252	1.33e-07	53	0.830565	2.74e-11	28	0.930453	0.327096	53	0.831371	4.25e-22	22	1.16349	0.0748942	23	0.90004	0.315967	23	0.835243	0.0503429	23	0.930698	0.232687	22	0.67386	0.00112302
P63318	KPCG_MOUSE	Prkcg	Protein kinase C gamma type	mmu:18752	6m	690	S	S690	15	1.15052	0.255204	15	0.9927	0.936807	23	1.57233	0.000999481	15	1.06686	0.6759	17	0.559269	0.000396659	19	1.19794	0.0878463	19	1.24194	0.0206528	19	1.04778	0.619325	19	0.744798	2.39e-05
P63318	KPCG_MOUSE	Prkcg	Protein kinase C gamma type	mmu:18752	1m	514	T	T514	41	0.850998	0.190475	32	0.499337	3.01e-07	17	2.50873	1.65e-05	36	0.598049	1.13e-10	8	1.39339	0.0272066	5	0.579442	0.0106645	0	---	---	0	---	---	0	---	---
P63318	KPCG_MOUSE	Prkcg	Protein kinase C gamma type	mmu:18752	3m	514	T	T514	0	---	---	1	1.04673	---	22	0.833459	0.183014	1	2.03404	---	64	1.08489	0.15647	66	0.941891	0.29215	57	0.64494	8.77e-09	64	0.910377	0.0377854	58	0.656563	3.18e-08
P63318	KPCG_MOUSE	Prkcg	Protein kinase C gamma type	mmu:18752	6m	514	T	T514	1	0.592362	---	1	0.381777	---	19	1.41778	0.0619779	1	0.330609	---	15	0.938106	0.598067	10	1.19533	0.193208	12	1.5135	0.00117336	10	0.97747	0.847695	10	0.675723	0.00607937
P63318	KPCG_MOUSE	Prkcg	Protein kinase C gamma type	mmu:18752	1m	655	T	T655	138	1.02733	0.260546	137	1.20518	2.21e-10	157	1.12766	0.0228066	138	1.26303	4.56e-15	135	1.03817	0.138584	115	1.43737	1.78e-14	111	1.44076	5.21e-17	111	0.961849	0.355285	117	1.11996	0.00331087
P63318	KPCG_MOUSE	Prkcg	Protein kinase C gamma type	mmu:18752	3m	655	T	T655	231	1.23647	1.81e-17	240	1.13079	2.41e-09	156	0.903393	0.00646047	233	1.06837	0.000487779	204	0.866604	1.82e-05	204	1.02625	0.0960133	204	0.97473	0.0428916	204	0.947505	0.000119608	205	0.852472	1.28e-26
P63318	KPCG_MOUSE	Prkcg	Protein kinase C gamma type	mmu:18752	6m	655	T	T655	204	1.76368	4.18e-28	188	1.57017	6.25e-20	147	1.17616	0.00225683	196	1.45095	1.66e-16	178	1.0154	0.333473	179	1.10076	4.15e-05	177	1.11007	4.73e-08	179	1.02958	0.0461055	178	0.902156	9.16e-08
P63318	KPCG_MOUSE	Prkcg	Protein kinase C gamma type	mmu:18752	1m	689	T	T689	1	5.54447	---	1	1.74358	---	5	1.53317	0.00434753	0	---	---	1	0.49697	---	1	2.17503	---	1	1.48402	---	1	0.756504	---	1	2.20008	---
P63318	KPCG_MOUSE	Prkcg	Protein kinase C gamma type	mmu:18752	3m	689	T	T689	8	0.874675	0.282682	8	0.887215	0.229772	7	1.21363	0.294406	8	0.748365	0.00955003	4	1.38795	0.268544	4	0.700221	0.0754631	5	0.834328	0.0994163	4	0.935816	0.610676	4	0.802503	0.0294132
P63318	KPCG_MOUSE	Prkcg	Protein kinase C gamma type	mmu:18752	6m	689	T	T689	2	1.27212	---	2	1.69736	---	5	0.975534	0.874363	2	2.4647	---	0	---	---	0	---	---	0	---	---	2	0.796985	---	2	0.853383	---
P68404	KPCB_MOUSE	Prkcb	Protein kinase C beta type	mmu:18751	1m	500	T	T500	41	0.850998	0.190475	32	0.499337	3.01e-07	17	2.50873	1.65e-05	36	0.598049	1.13e-10	8	1.39339	0.0272066	5	0.579442	0.0106645	0	---	---	0	---	---	0	---	---
P68404	KPCB_MOUSE	Prkcb	Protein kinase C beta type	mmu:18751	3m	500	T	T500	0	---	---	1	1.04673	---	22	0.833459	0.183014	1	2.03404	---	64	1.08489	0.15647	66	0.941891	0.29215	57	0.64494	8.77e-09	64	0.910377	0.0377854	58	0.656563	3.18e-08
P68404	KPCB_MOUSE	Prkcb	Protein kinase C beta type	mmu:18751	6m	500	T	T500	1	0.592362	---	1	0.381777	---	19	1.41778	0.0619779	1	0.330609	---	15	0.938106	0.598067	10	1.19533	0.193208	12	1.5135	0.00117336	10	0.97747	0.847695	10	0.675723	0.00607937
